# Supplementary material
Source: Springer Nature journal article supplement (https://www.springermedizin.de/resource/supplementary/13044_2009_13_MOESM1_ESM.pdf/9659954)

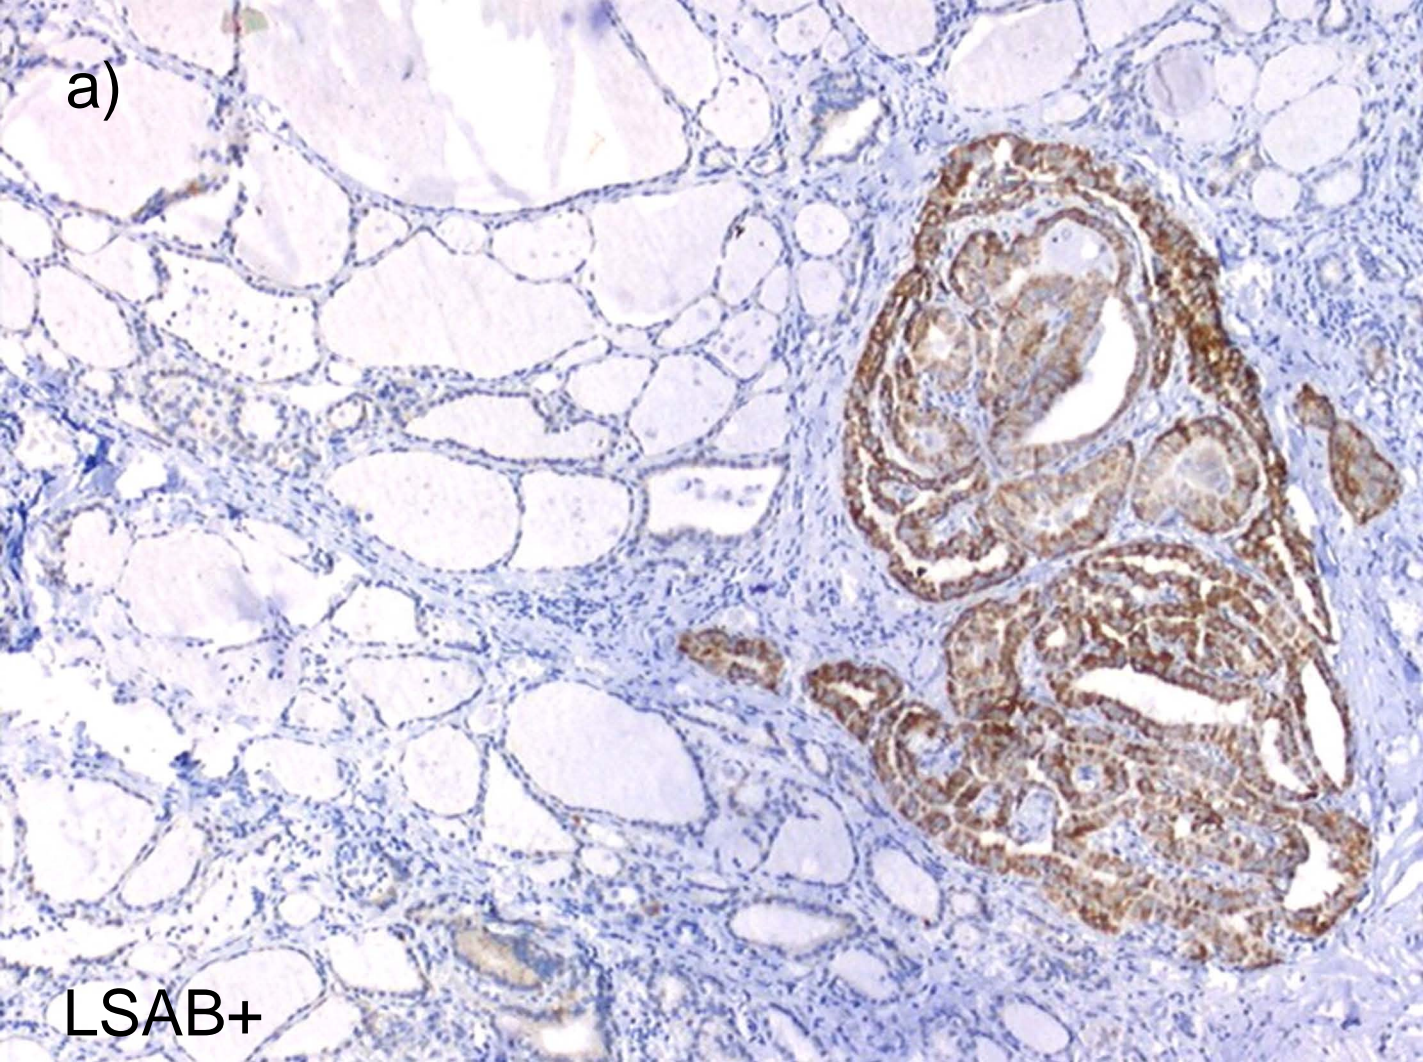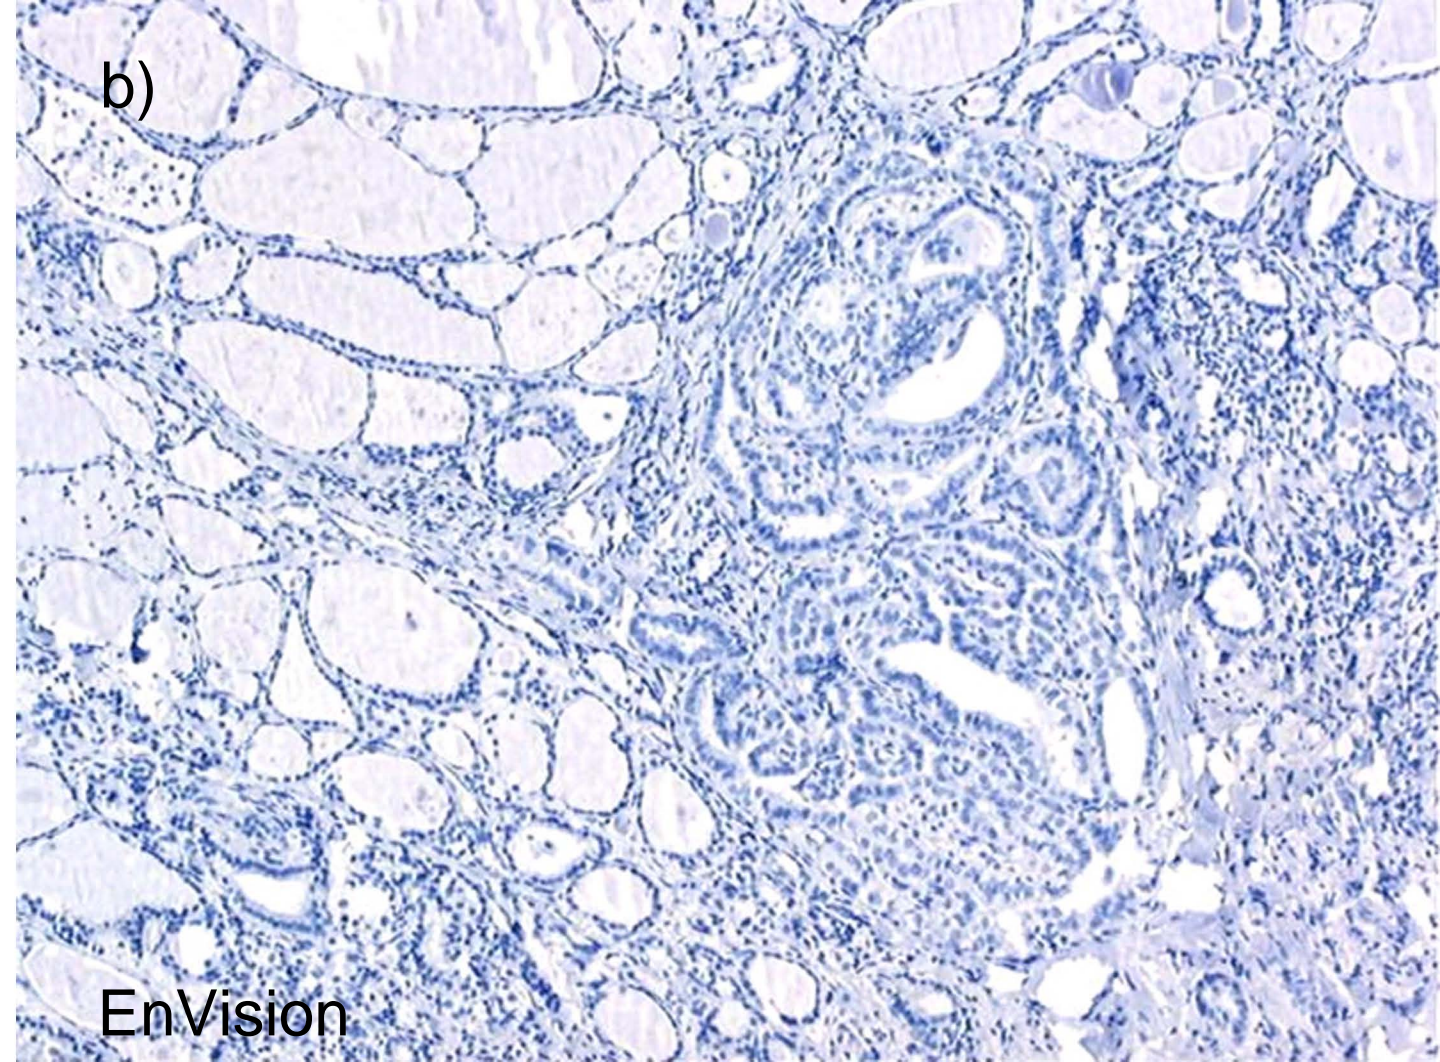

Supplement: MOESM1 [file 9659954]
